# Supplementary material for: Investigation of the impact of A-site cation disorder on the structure, magnetic properties, and magnetic entropy change of trisubstituted divalent ions in La0.7(Ba,Ca,Sr)0.3MnO3 manganite
Source: Royal Society of Chemistry journal article supplement (doi:10.1039/d4cp01039f), 2024-01-01
Supplement: d4cp01039f1.pdf [file d4cp01039f1.pdf]

## Supplementary Information

Table 1S. Fitting parameter of XPS spectra La 3d of LBCS compounds.

| Sample |                    | La 3d                |        |        |                      |        |        |
|--------|--------------------|----------------------|--------|--------|----------------------|--------|--------|
|        |                    | La 3d <sub>5/2</sub> |        |        | La 3d <sub>3/2</sub> |        |        |
| LBCS-3 | Peak Position (eV) | 833.49               | 835.07 | 837.91 | 850.32               | 854.78 | 851.84 |
|        | Area( %)           | 15.03                | 22.62  | 23.19  | 10.02                | 14.06  | 15.09  |
| LBCS-4 | Peak Position (eV) | 833.49               | 835.07 | 837.91 | 850.32               | 854.78 | 851.84 |
|        | Area( %)           | 15.03                | 22.62  | 23.19  | 10.02                | 14.06  | 15.09  |
| LBCS-5 | Peak Position (eV) | 833.64               | 835.36 | 837.94 | 850.39               | 854.72 | 852.02 |
|        | Area( %)           | 19.10                | 17.83  | 23.06  | 12.74                | 15.38  | 11.89  |
| LBCS-6 | Peak Position (eV) | 833.60               | 835.35 | 837.91 | 850.41               | 854.77 | 852.05 |
|        | Area( %)           | 18.99                | 18.14  | 22.86  | 12.67                | 15.25  | 12.10  |
| LBCS-7 | Peak Position (eV) | 833.66               | 835.37 | 837.97 | 850.48               | 854.83 | 852.12 |
|        | Area( %)           | 17.94                | 18.66  | 23.39  | 11.96                | 15.60  | 12.45  |
| LBCS-8 | Peak Position (eV) | 833.54               | 835.11 | 837.89 | 850.42               | 854.81 | 852.06 |
|        | Area( %)           | 14.20                | 20.28  | 23.24  | 11.84                | 16.91  | 13.53  |

Table 2S. Fitting parameter of XPS spectra Ba 3d, Ca 2p, and Sr 3d of LBCS compounds.

| Sample |                    | Ba 3d                |        |                      |        | Ca 2p                |                      | Sr 3d                |                      |        |
|--------|--------------------|----------------------|--------|----------------------|--------|----------------------|----------------------|----------------------|----------------------|--------|
|        |                    | Ba 3d <sub>5/2</sub> |        | Ba 3d <sub>3/2</sub> |        | Ca 2p <sub>3/2</sub> | Ca 2p <sub>1/2</sub> | Sr 3d <sub>5/2</sub> | Sr 3d <sub>3/2</sub> |        |
| LBCS-3 | Peak Position (eV) | 778.13               | 779.62 | 793.49               | 794.98 | 346.44               | 349.98               | 132.26               | 133.88               | 134.49 |
|        | Area( %)           | 22.43                | 37.56  | 14.96                | 25.05  | 65.76                | 34.24                | 54.59                | 36.41                | 9.00   |
| LBCS-4 | Peak Position (eV) | 778.13               | 779.62 | 793.49               | 794.98 | 346.44               | 349.98               | 132.26               | 133.88               | 134.49 |
|        | Area( %)           | 22.43                | 37.56  | 14.96                | 25.05  | 65.76                | 34.24                | 54.59                | 36.41                | 9.00   |
| LBCS-5 | Peak Position (eV) | 778.26               | 779.70 | 793.61               | 795.08 | 346.52               | 350.07               | 132.38               | 134.06               | 135.45 |
|        | Area( %)           | 28.41                | 31.58  | 18.95                | 21.06  | 67.66                | 32.34                | 49.03                | 47.08                | 3.90   |
| LBCS-6 | Peak Position (eV) | 778.23               | 779.71 | 793.57               | 795.06 | 346.49               | 350.04               | 132.32               | 134.00               | 135.13 |
|        | Area( %)           | 25.87                | 34.11  | 17.26                | 22.75  | 64.38                | 35.62                | 53.59                | 39.60                | 6.81   |
| LBCS-7 | Peak Position (eV) | 778.23               | 779.73 | 793.53               | 794.93 | 346.57               | 350.15               | 132.42               | 134.12               | 135.43 |
|        | Area( %)           | 32.42                | 29.91  | 17.72                | 19.95  | 65.85                | 34.15                | 54.44                | 40.82                | 4.74   |
| LBCS-8 | Peak Position (eV) | 778.16               | 779.67 | 793.49               | 795.03 | 346.56               | 350.14               | 132.34               | 134.05               | 135.31 |
|        | Area( %)           | 30.47                | 29.52  | 20.32                | 19.69  | 67.06                | 32.94                | 52.33                | 44.57                | 3.10   |
